# Supplementary material for: Highly sensitive colorimetric detection of HgII and CuII in aqueous solutions: from amino acids toward solid platforms
Source: Royal Society of Chemistry journal article supplement (doi:10.1039/c4an01743a), 2014-11-24
Supplement: c4an01743a1.pdf [file c4an01743a1.pdf]

## Electronic supplementary information(ESI)

Highly sensitive colorimetric detection and removal of Hg<sup>II</sup> and Cu<sup>II</sup> in aqueous solution: From amino acids toward solid platforms

Jooyoung Park, Byunggyu In, Lok Nath Neupane, and Keun-Hyeung Lee\*

Bioorganic chemistry Lab, Center for Design and Applications of Molecular Catalysts, Department of Chemistry and Chemical Engineering, Inha University, Incheon, 402-751, South Korea

\*E-mail: [leekh@inha.ac.kr](mailto:leekh@inha.ac.kr) (K-H. Lee)

| Table of Contents                                                                                   | Pages |
|-----------------------------------------------------------------------------------------------------|-------|
| <b>Scheme S1.</b> Synthesis of <b>NBD-H-PEG-PS</b>                                                  | S2    |
| <b>Figure S1.</b> ESI-MS and HPLC spectrum of <b>NBD-H</b>                                          | S3    |
| <b>Figure S2.</b> <sup>1</sup> H and <sup>13</sup> C NMR of <b>NBD-H</b>                            | S4    |
| <b>Figure S3.</b> FAB-HRMS spectrum of <b>NBD-H</b>                                                 | S5    |
| <b>Figure S4.</b> <b>NBD-H</b> binding for Ag <sup>I</sup>                                          | S6    |
| <b>Figure S5.</b> Job's plot of <b>NBD-H</b> with Hg <sup>II</sup> and Cu <sup>II</sup>             | S7    |
| <b>Figure S6.</b> Determination of K <sub>d</sub> based on UV/VIS titration                         | S8    |
| <b>Figure S7.</b> Detection limit of <b>NBD-H</b> with Hg <sup>II</sup> and Cu <sup>II</sup>        | S9    |
| <b>Figure S8.</b> Fluorescence emission of <b>NBD-H</b>                                             | S10   |
| <b>Figure S9.</b> Fluorescence titration of <b>NBD-H</b> with Hg <sup>II</sup> and Cu <sup>II</sup> | S11   |
| <b>Figure S10.</b> Competition of <b>NBD-H</b> with Hg <sup>II</sup> and Cu <sup>II</sup>           | S12   |
| <b>Figure S11.</b> Removing the interference effect of Ag <sup>I</sup> using NaCl                   | S13   |
| <b>Figure S12.</b> Other anion effect of Hg <sup>II</sup>                                           | S14   |
| <b>Figure S13.</b> pH titration of <b>NBD-H</b> with Hg <sup>II</sup> and Cu <sup>II</sup>          | S15   |
| <b>Figure S14.</b> detection of <b>NBD-H-PEG-PS</b> with Cu <sup>II</sup>                           | S16   |

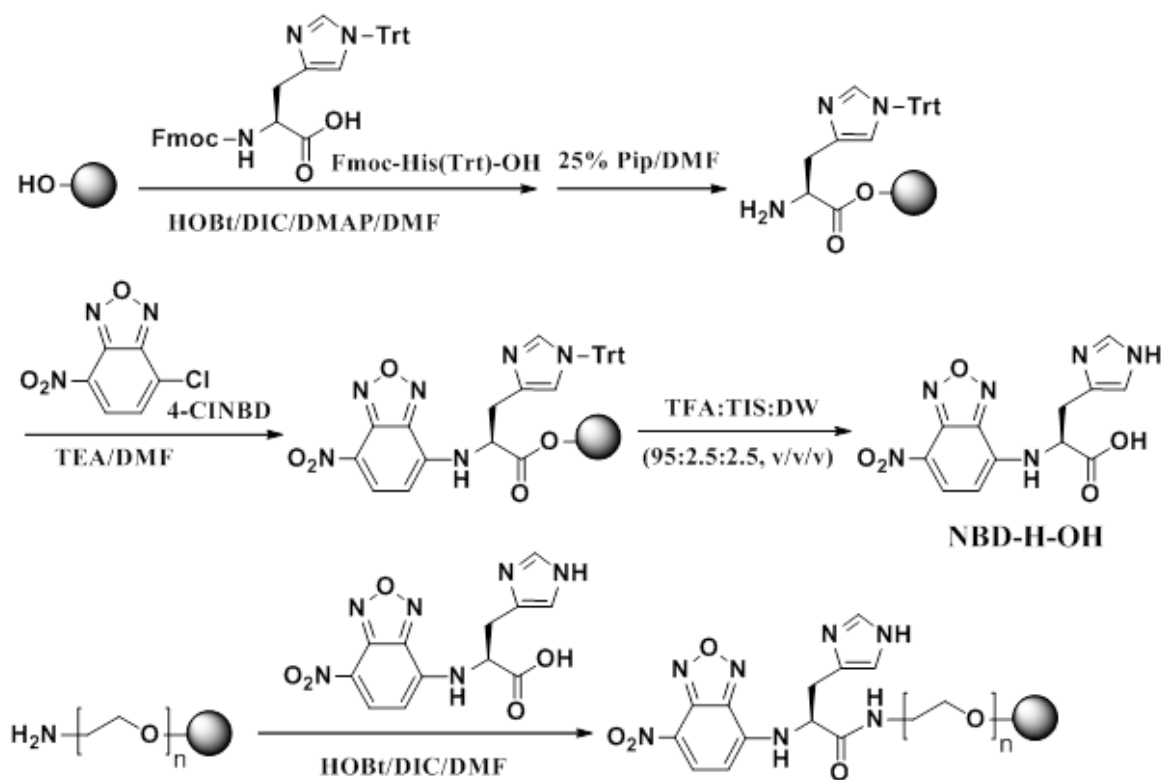

**Scheme S1.** Synthesis of **NBD-H-PEG-PS**

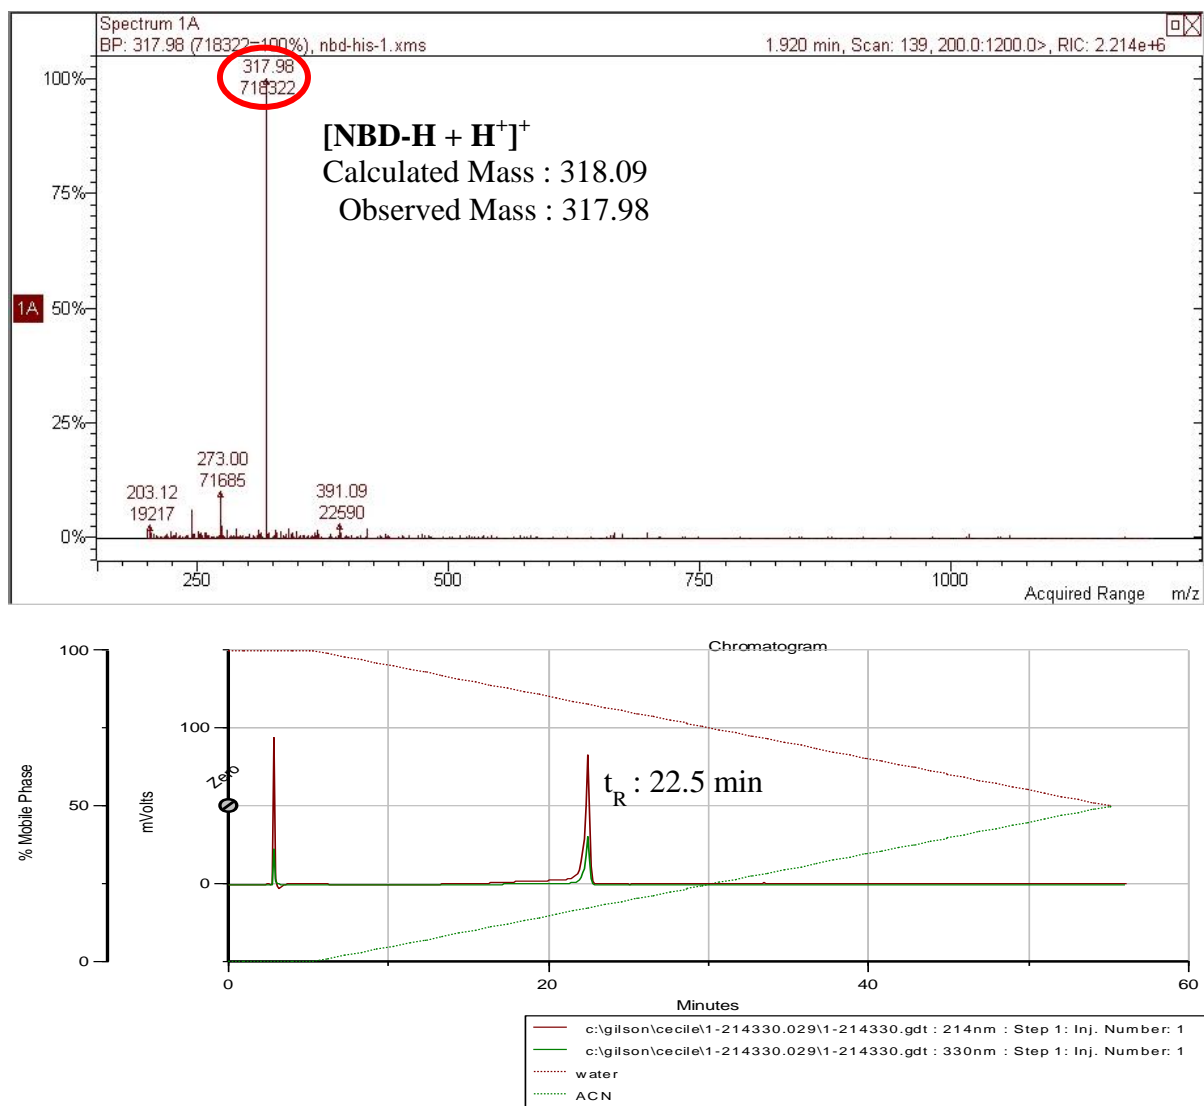

**Figure S1.** ESI-MS and HPLC spectrum of **NBD-H**

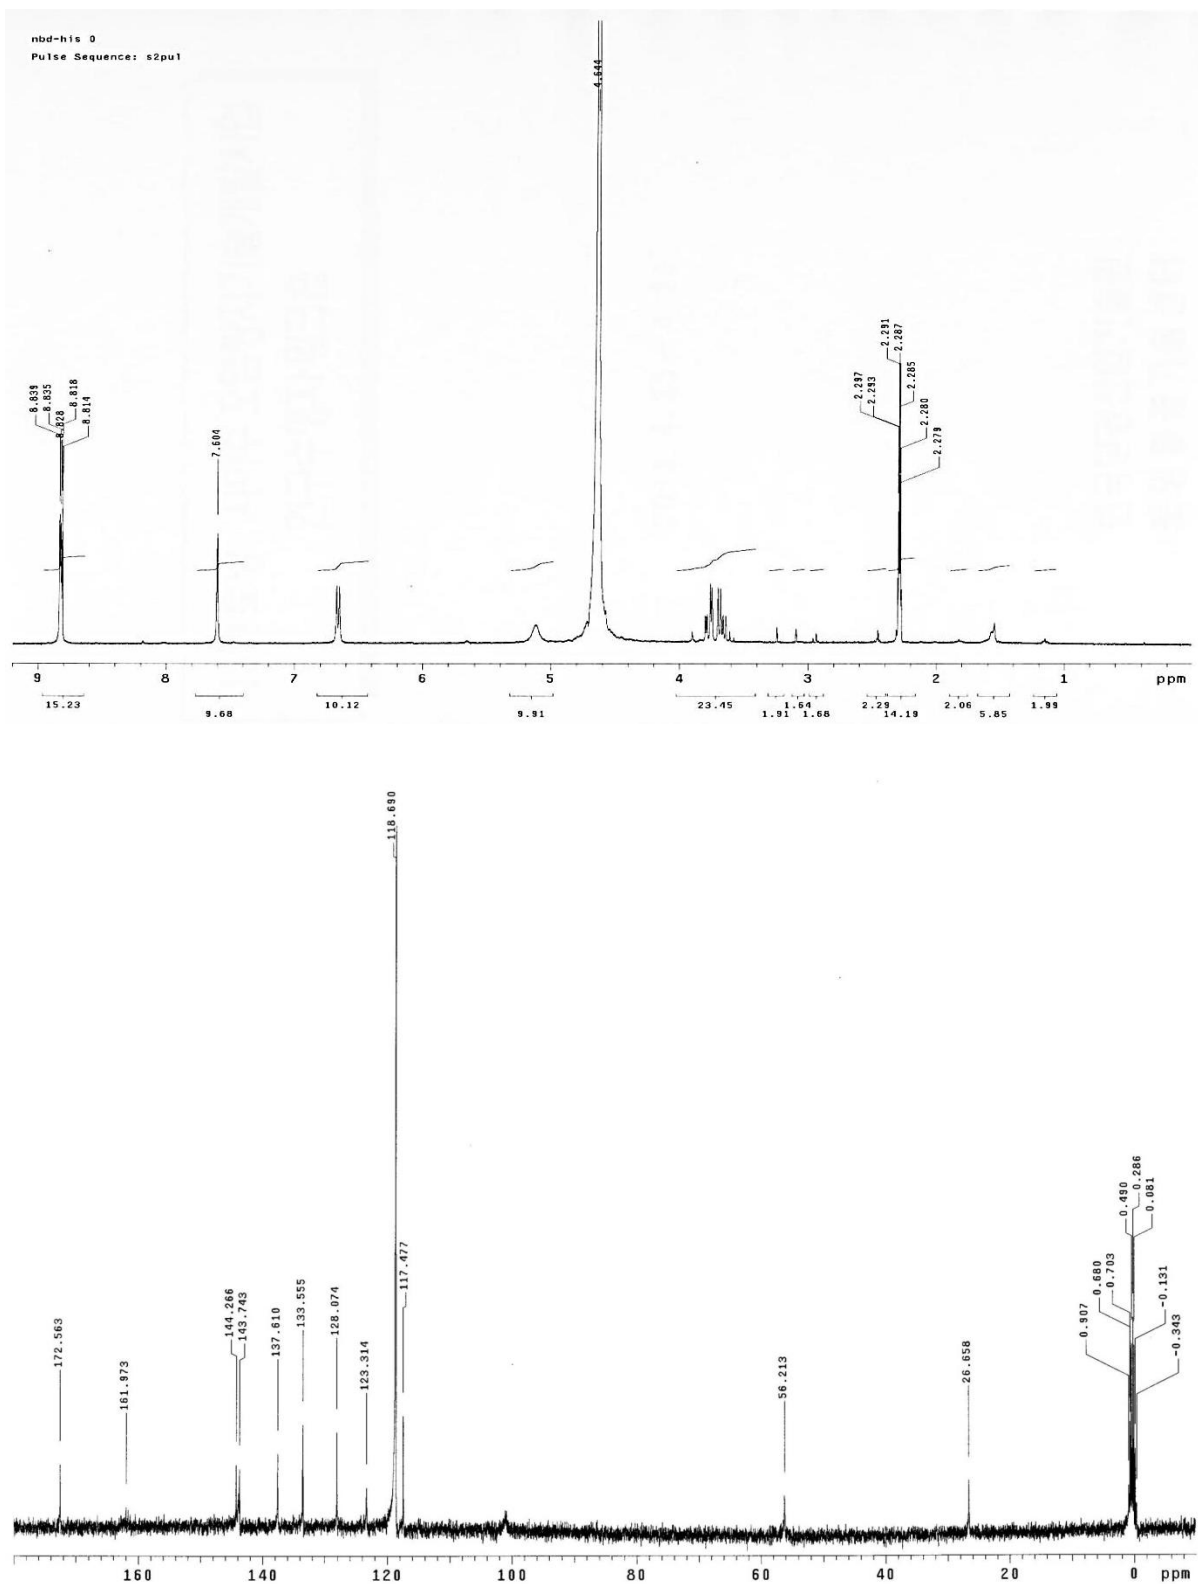

**Figure S2.** (a)  $^1\text{H}$  NMR of NBD-H (15 mM) in 50%  $\text{ACN-d}_3/\text{D}_2\text{O}$  and (b)  $^{13}\text{C}$  NMR of NBD-H in 50%  $\text{ACN-d}_3/\text{D}_2\text{O}$  at 25 °C.

#### 4) NBD-HIS with GLY (POS)

BG\_140414\_NBD-His\_003-c1 #77-100 RT: 1.14-1.48 AV: 24 SB: 14 0.33-0.53 NL: 6.68E3  
T: + c FAB Full ms [229.50-380.50]

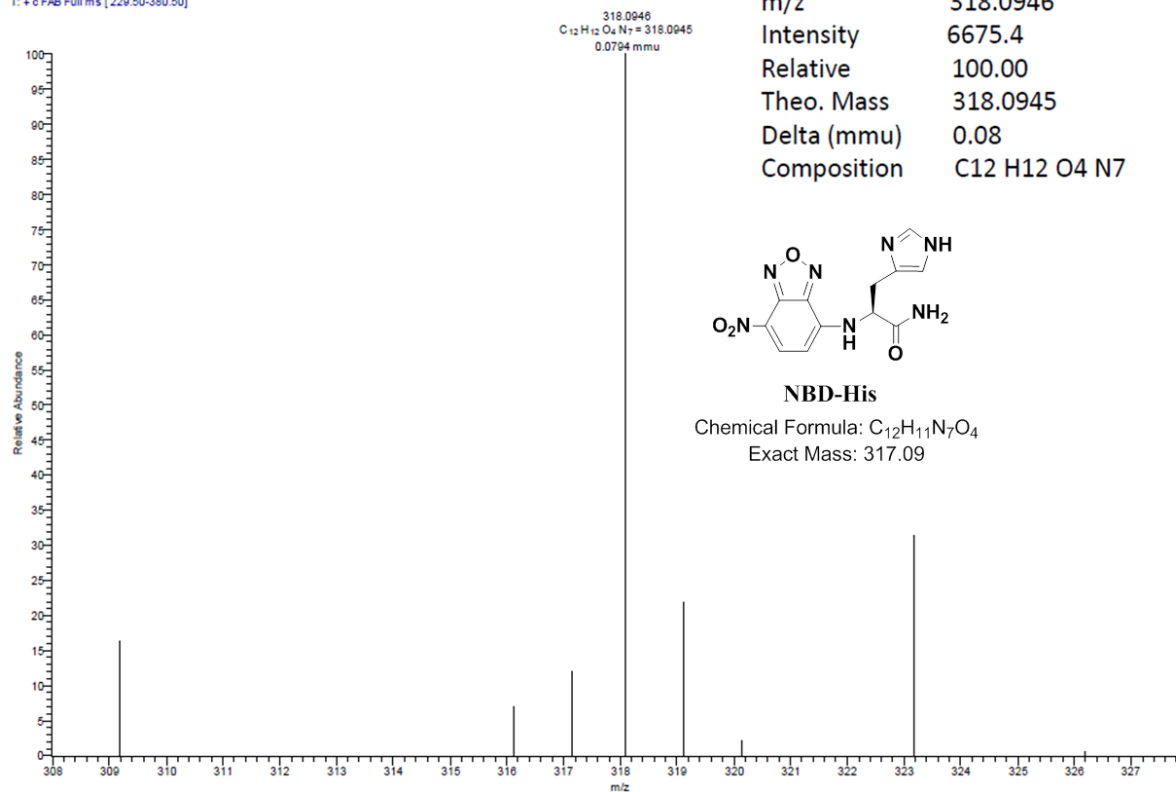

**Figure S3.** FAB-HRMS spectrum of **NBD-H**

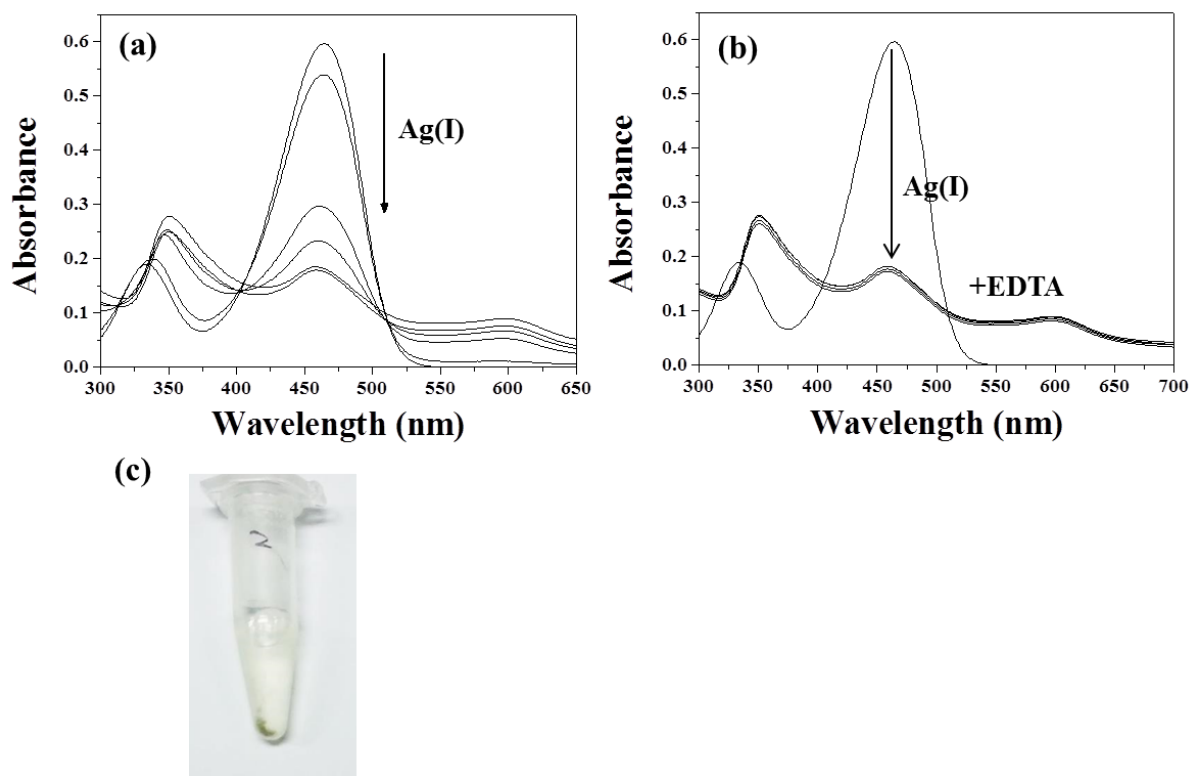

**Figure S4.** UV-VIS absorbance spectra of **NBD-H** (30  $\mu\text{M}$ ) in 10 mM HEPES buffer solution (pH 7.4) containing 3% ACN (a) with increasing concentration of  $\text{Ag}^{\text{I}}$  (0, 20, 40, ..., 100  $\mu\text{M}$ ) and (b) EDTA (100, 200, 300  $\mu\text{M}$ ) after adding  $\text{Ag}^{\text{I}}$  (100  $\mu\text{M}$ ). (d) The centrifuged solution of **NBD-H** with  $\text{Ag}^{\text{I}}$ .

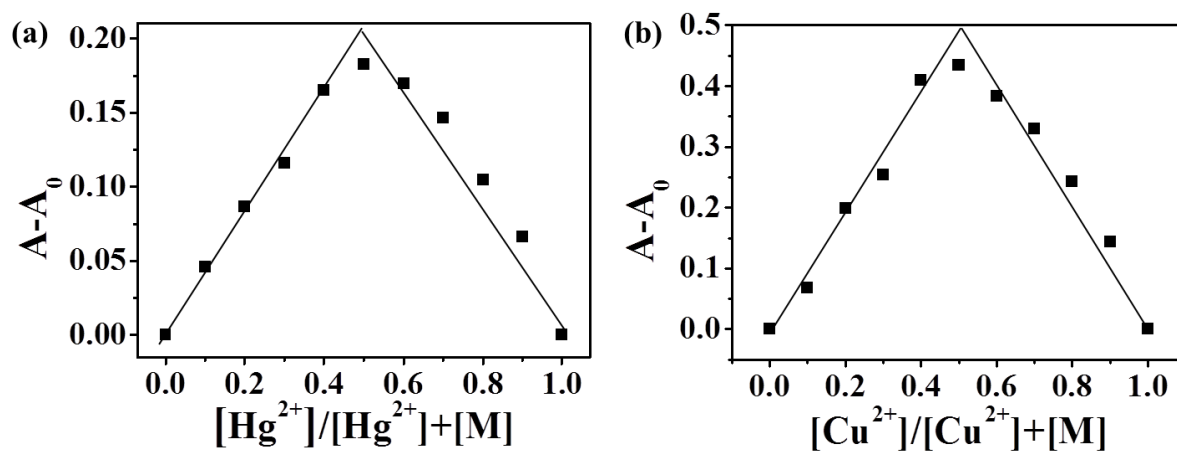

**Figure S5.** A Job plot for **NBD-H** (30  $\mu$ M) with (a)  $\text{Hg}^{\text{II}}$  and (b)  $\text{Cu}^{\text{II}}$  in 10mM HEPES buffer solution (pH 7.4) containing 5% ACN.

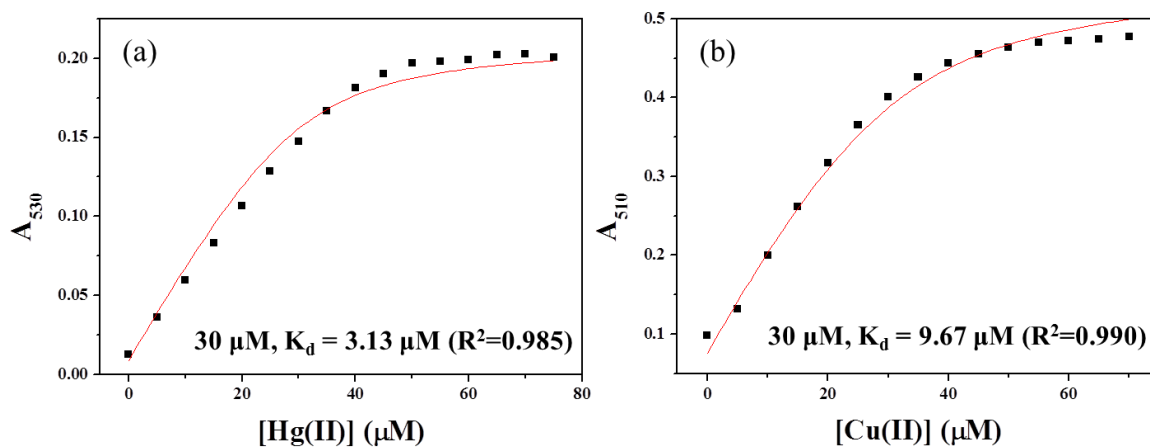

**Figure S6.** Absorbance titration curve of **NBD-H** (30  $\mu M$ ) in 10 mM HEPES buffer solution (pH 7.4) containing 3% ACN (a) with increasing concentration of  $Hg^{II}$  (0, 5, 10, 15, ..., 70, 75  $\mu M$ ) and (b)  $Cu^{II}$  (0, 5, 10, 15, ..., 65, 70  $\mu M$ )



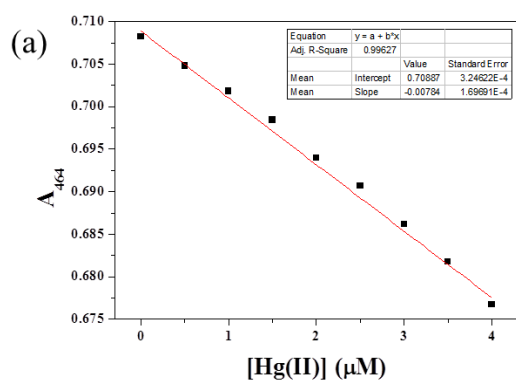

$$\left| \frac{3\sigma}{M} \right| = \left| \frac{3 \cdot 0.00046}{-0.00784} \right| = 0.176 \mu\text{M} \quad (R^2=0.99627)$$

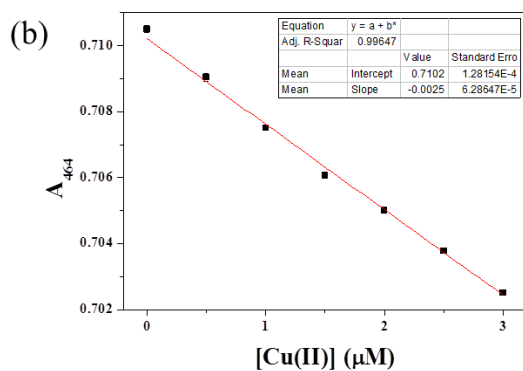

$$\left| \frac{3\sigma}{M} \right| = \left| \frac{3 \cdot 0.000141}{-0.00259} \right| = 0.163 \mu\text{M} \quad (R^2=0.99647)$$

**Figure S7.** Detection limit of **NBD-H** (30  $\mu\text{M}$ ) with (a)  $\text{Hg}^{\text{II}}$  or (b)  $\text{Cu}^{\text{II}}$  ions in 10 mM HEPES buffer solution (pH 7.4) containing 3% ACN.

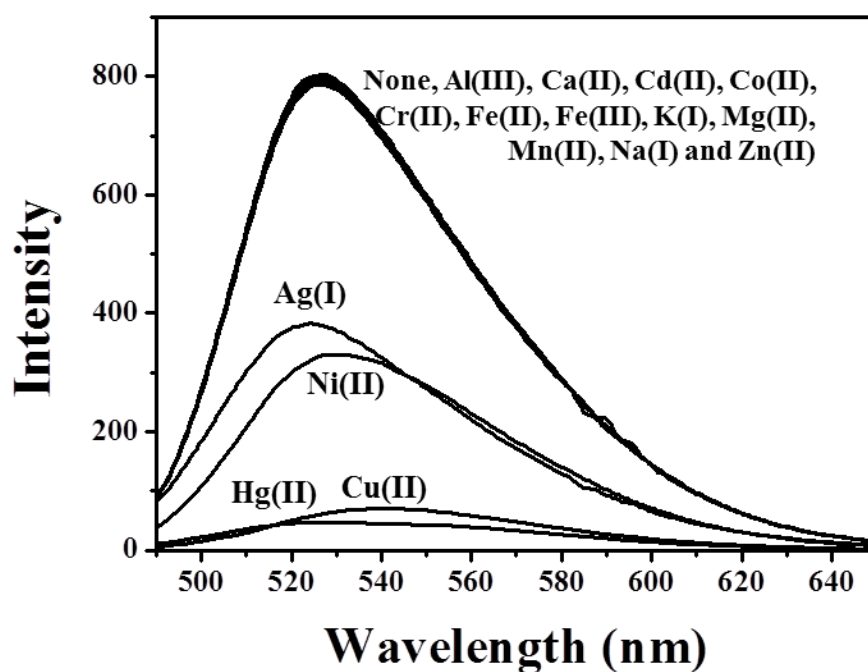

**Figure S8.** Fluorescence emission spectra of NBD-H (30  $\mu\text{M}$ ) in 10 mM HEPES buffer solution (pH 7.4) containing 3% ACN in presence of various metal ions (60  $\mu\text{M}$ ).

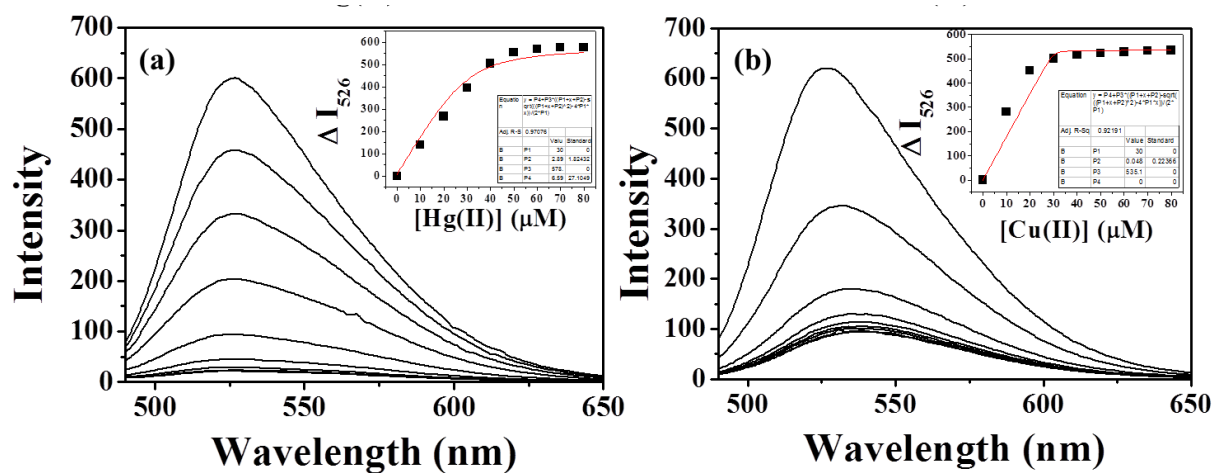

**Figure S9.** Fluorescence emission spectra of **NBD-H** (30  $\mu\text{M}$ ) in 10 mM HEPES buffer solution (pH 7.4) containing 3% ACN (a) with increasing concentration of  $\text{Hg}^{\text{II}}$  and (b)  $\text{Cu}^{\text{II}}$  (0, 10, ..., 80  $\mu\text{M}$ ). Inset: Fluorescence titration curve of **NBD-H** (30  $\mu\text{M}$ ) with increasing concentration of (a)  $\text{Hg}^{\text{II}}$  and (b)  $\text{Cu}^{\text{II}}$

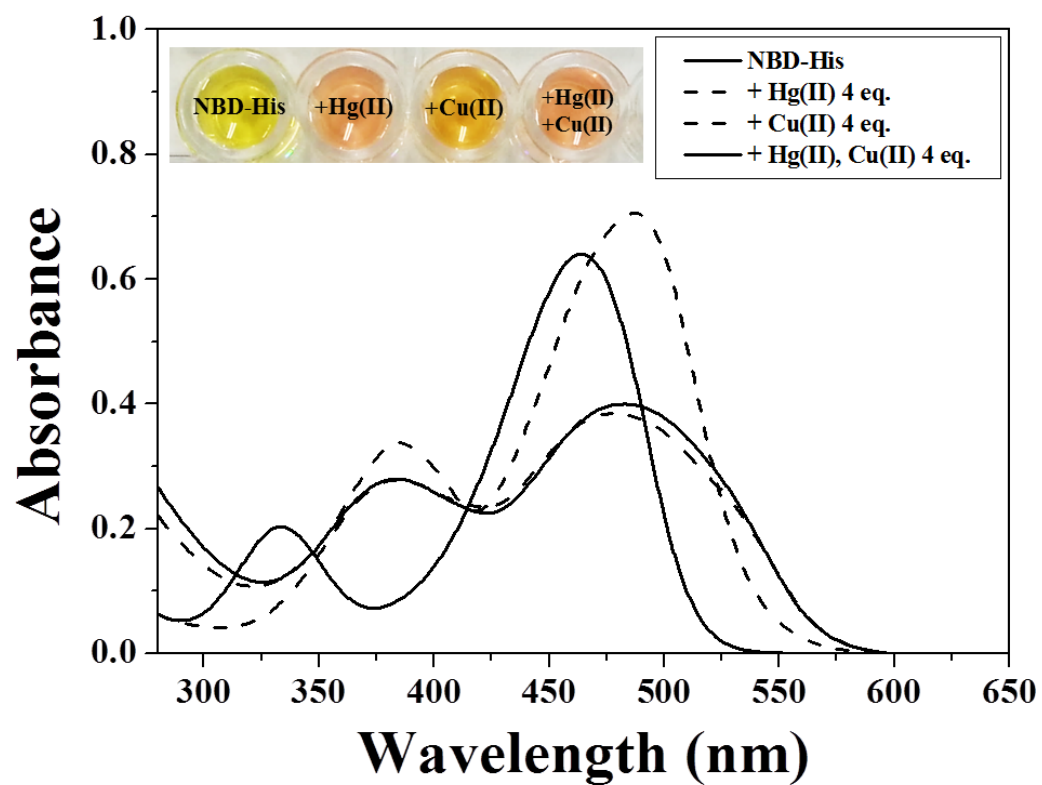

**Figure S10.** UV-VIS absorbance spectra of **NBD-H**(30 μM) in 10 mM HEPES buffer solution (pH 7.4) containing 3% ACN in the presence of  $\text{Hg}^{\text{II}}$  and/or  $\text{Cu}^{\text{II}}$ .

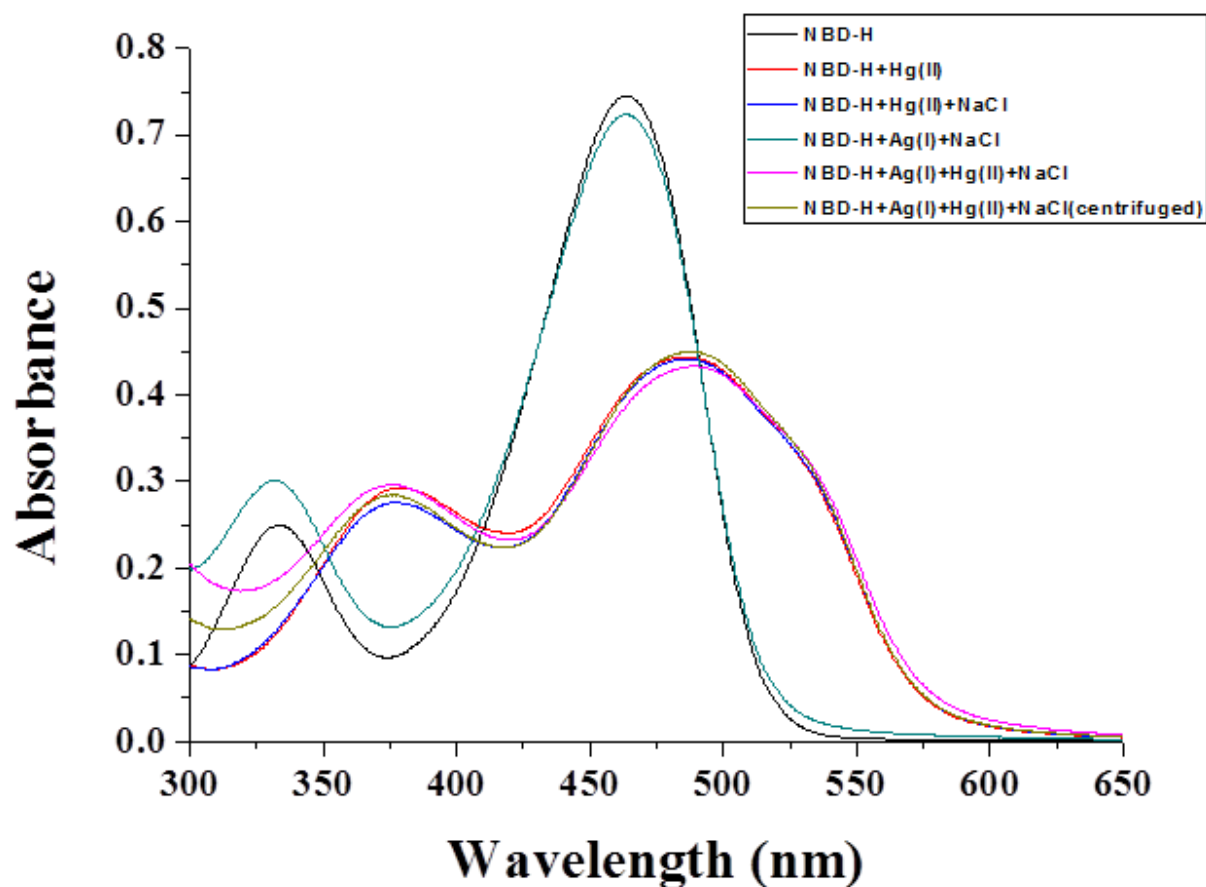

**Figure S11.** UV-VIS absorbance spectra of **NBD-H** (30 μM) in 10 mM HEPES buffer solution at pH 7.4 containing 3% ACN and 1 mM NaCl in the presence of  $\text{Ag}^{\text{I}}$  (2 equiv.) and/or  $\text{Hg}^{\text{II}}$  (2 equiv.).

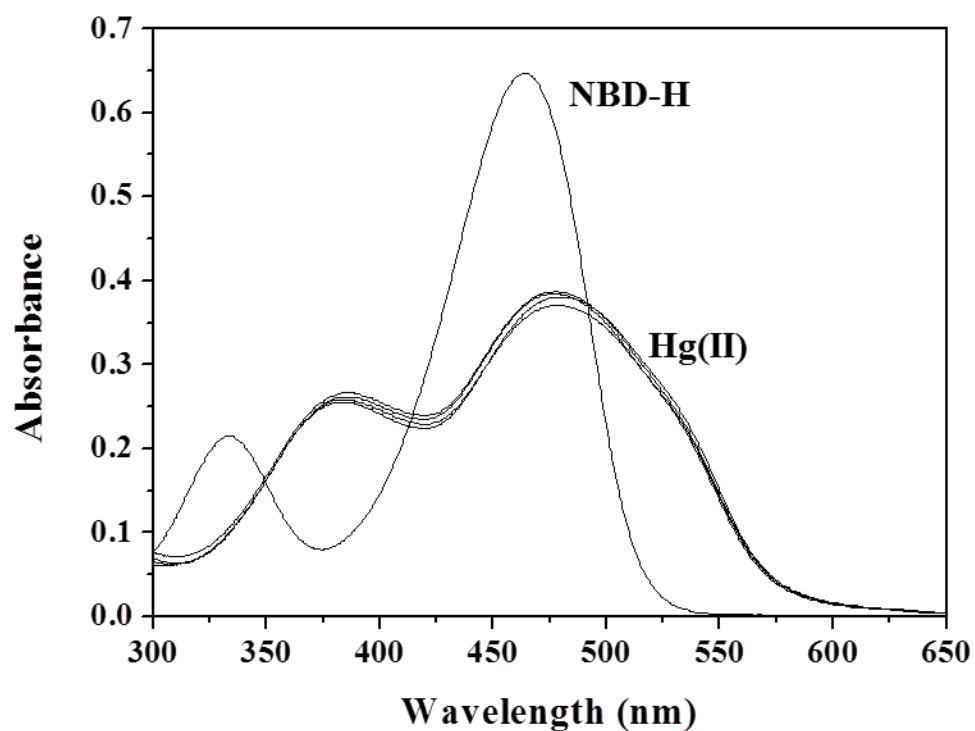

**Figure S12.** UV-VIS absorbance spectra of **NBD-H** (30  $\mu$ M) in 10 mM HEPES buffer solution (pH 7.4) containing 3% ACN in presence of 2 equiv. of  $\text{Hg}^{\text{II}}$  ( $\text{HgCl}_2$ ,  $\text{Hg}(\text{OAc})_2$ ,  $\text{Hg}(\text{NO}_3)_2$ , and  $\text{Hg}(\text{ClO}_4)_2$ ).

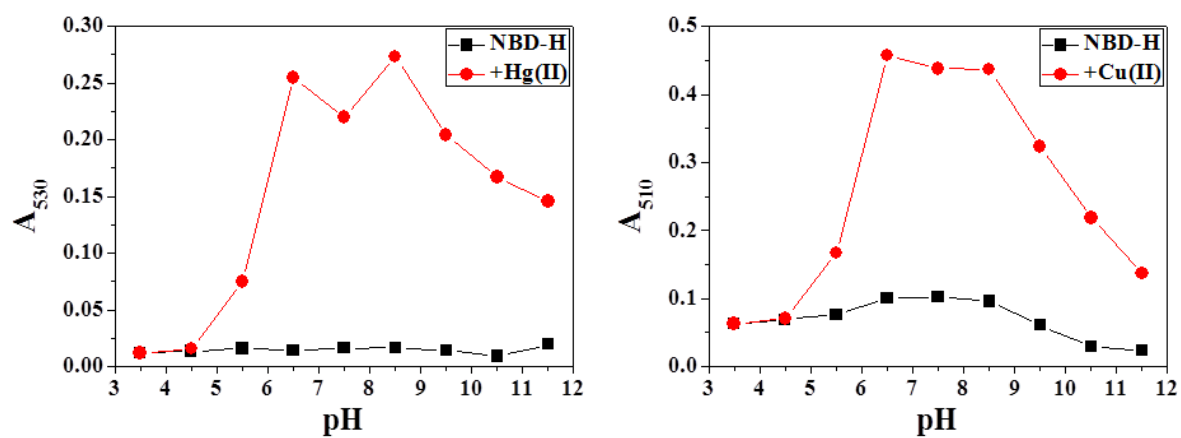

**Figure S13.** UV/VIS absorbance spectra of **NBD-H** in different pH of 10 mM buffer solution in absence of these metal ions (black line) and in presence of (a)  $Hg^{II}$  and (b)  $Cu^{II}$  (2 equiv.) (red line)

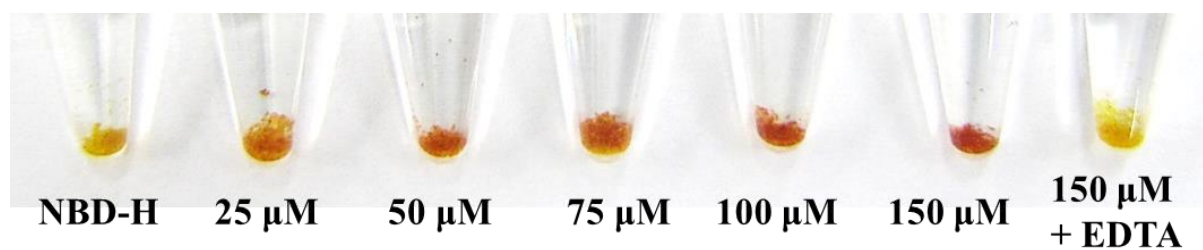

**Figure S14.** Color change of **NBD-H**-PEG-PS (100 μM) in 10 mM HEPES buffer (pH 7.4) with increasing concentration of  $\text{Cu}^{\text{II}}$  and/or 300 μM EDTA.
